# Supplementary material for: Determination of layered nickel hydroxide phases in materials disordered by stacking faults and interstratification
Source: Royal Society of Chemistry journal article supplement (doi:10.1039/d2ta07655a), 2022-12-06
Supplement: d2ta07655a1.pdf [file d2ta07655a1.pdf]

## Electronic Supplementary Information (ESI)

### Determination of Layered Nickel Hydroxide Phases in Materials Disordered by Stacking Faults and Interstratification

Kurt Lawson<sup>a</sup>, Samuel P. Wallbridge<sup>a</sup>, Amy E. Catling<sup>a</sup>, Caroline A. Kirk<sup>b</sup> and Sandra E. Dann<sup>\*a</sup>

<sup>a</sup> Department of Chemistry, Loughborough University, Loughborough, U.K.

<sup>b</sup> School of Chemistry, University of Edinburgh, Edinburgh, U.K.

Email: S.E.Dann@lboro.ac.uk

## Extended Experimental Section

### Material Preparation

$\text{Ni}_3(\text{OH})_4(\text{NO}_3)_2$  was prepared by two methods. The first sample was prepared by the precipitation method described by Petrov *et al.*<sup>1</sup> where a sodium hydroxide solution (0.50 M) was added dropwise by burette to a stirred solution of nickel(II) nitrate hexahydrate (3.5 M, 25 mL) heated to >90 °C until the solution pH was 6.0. The addition was performed at less than one drop per second to keep a constant solution volume while heating with care taken to prevent water condensing in the glassware. The final product was washed with water (ca. 250 mL) and dried at 120 °C for 48 h. The second sample was prepared using the thermolysis method described by Biswick *et al.*<sup>2</sup> which involved heating nickel(II) nitrate hexahydrate (5.0 g) in an oven at 220 °C for 2 h with stirring every 15 min. The product was washed with anhydrous ethanol (ca. 500 mL) to remove any nickel(II) nitrate that remained and dried at 120 °C for 48 h.

$\text{Ni}(\text{OH})(\text{NO}_3)\cdot\text{H}_2\text{O}$  was prepared by the solid-state mechanochemical synthesis method outlined by Thomas.<sup>3</sup> An agate pestle and mortar was heated in an oven set to 120 °C overnight to which nickel(II) nitrate hexahydrate (2.18 g, 7.5 mmol) and solid sodium hydroxide (0.30 g, 7.5 mmol) were added. The reagents were ground together into a uniform paste (ca. 2 min) to produce a mixture of the hydroxynitrate phase product and sodium nitrate (nitratine). The sodium nitrate was removed by grinding the sample in hot, anhydrous ethanol (ca. 1 L) which was repeatedly decanted with caution taken to prevent the product from drying. The final product was washed with three aliquots of hot propanone (ca. 100 mL) and filtered using a hot sintered glass crucible (grade 4) under vacuum.

## Extended Data Figures

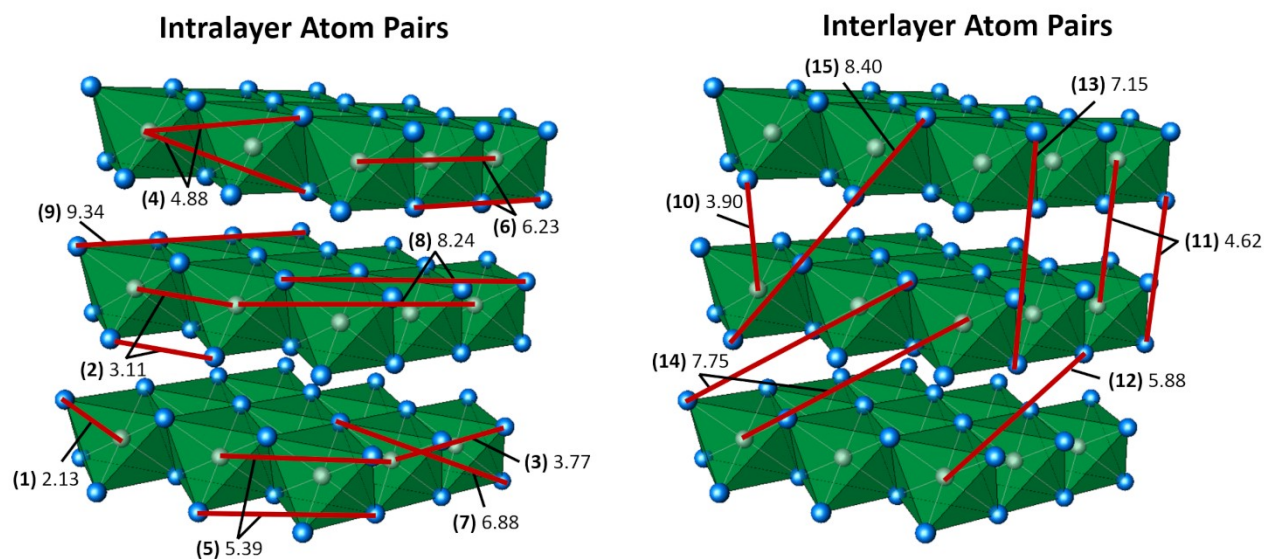

**Figure S1.** Assignment of the intralayer and interlayer atomic pair distances (in Å) to the crystal structure determined for beta-phase nickel hydroxide as the mineral theophrastite.<sup>4</sup>

### Unbound Nitrate ( $D_{3h}$ symmetry)

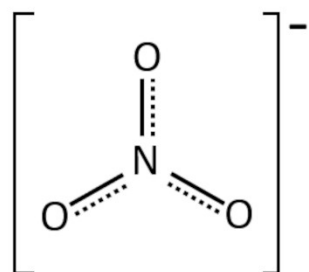

### Cation Bound Nitrate ( $C_{2v}$ symmetry)

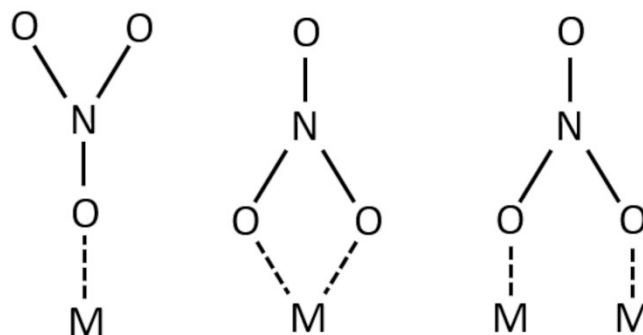

**Figure S2.** The nitrate anion with  $D_{3h}$  symmetry when unbound (left) and with  $C_{2v}$  symmetry when covalently coordinated (right).

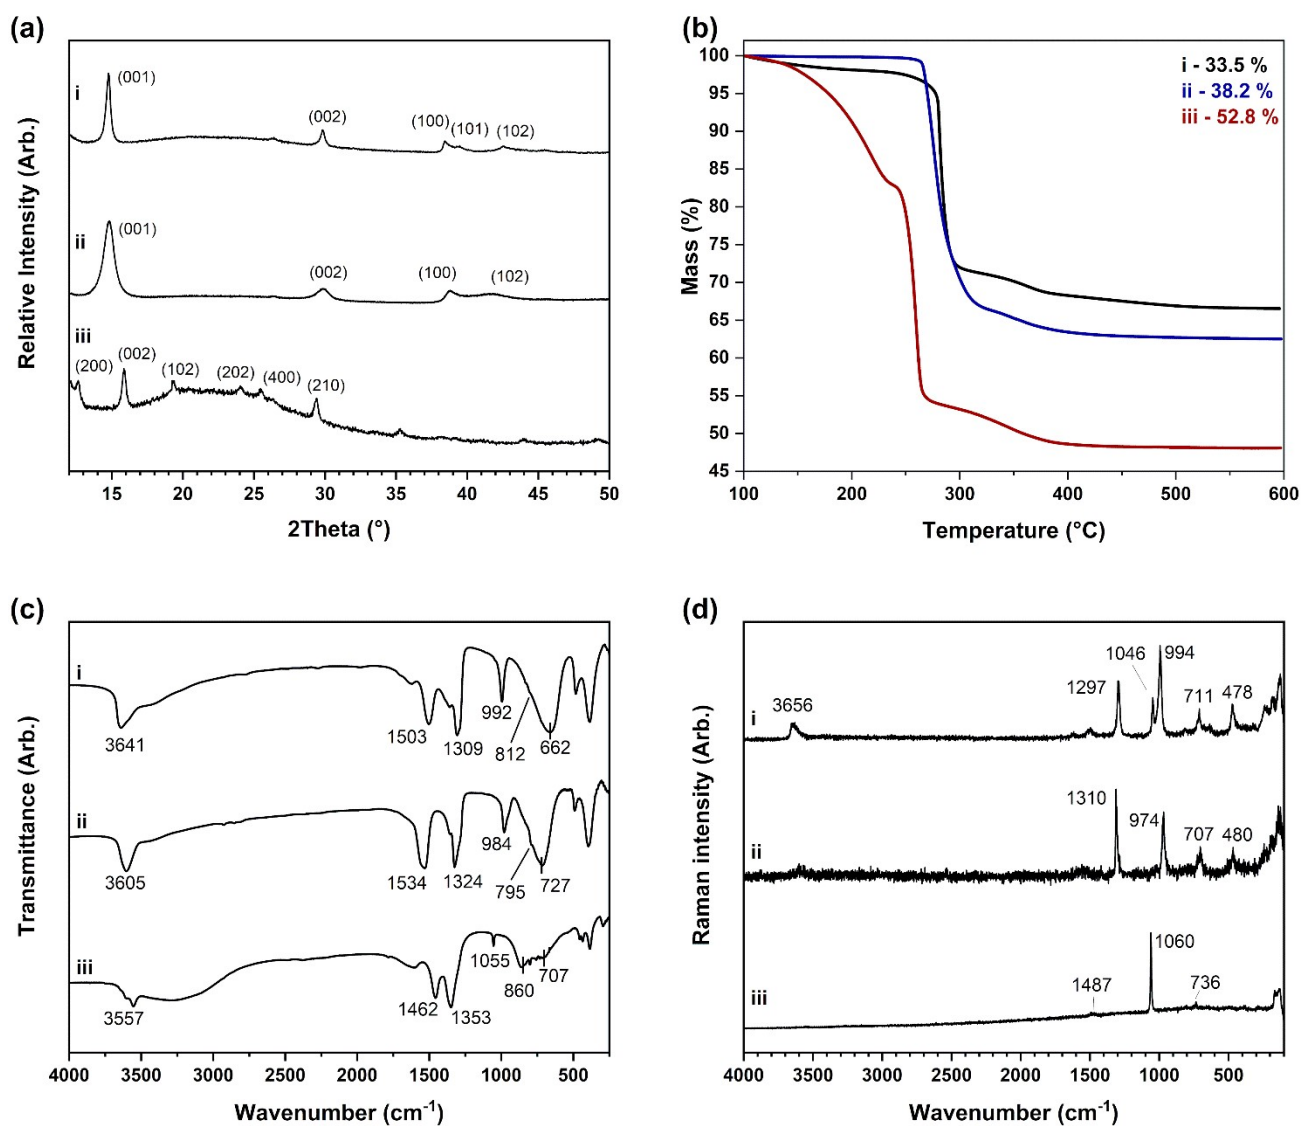

**Figure S3.** Data collected from nickel hydroxynitrates prepared by (i) Petrov precipitation (ii) metal(II) nitrate thermolysis and (iii) mechanochemical synthesis methods. (a) Powder X-ray diffraction patterns collected with Co K<sub>α1</sub> radiation ( $\lambda = 1.7889 \text{ \AA}$ ). The hkl values given are Ni<sub>3</sub>(OH)<sub>4</sub>(NO<sub>3</sub>)<sub>2</sub> (ICDD PDF 22-752) and Ni(OH)(NO<sub>3</sub>)·H<sub>2</sub>O (ICDD PDF 27-939). (b) Thermogravimetric weight loss analysis via decomposition of each phase to nickel(II) oxide. (c) Infrared absorption spectra as CsI disks. (d) Raman spectra.

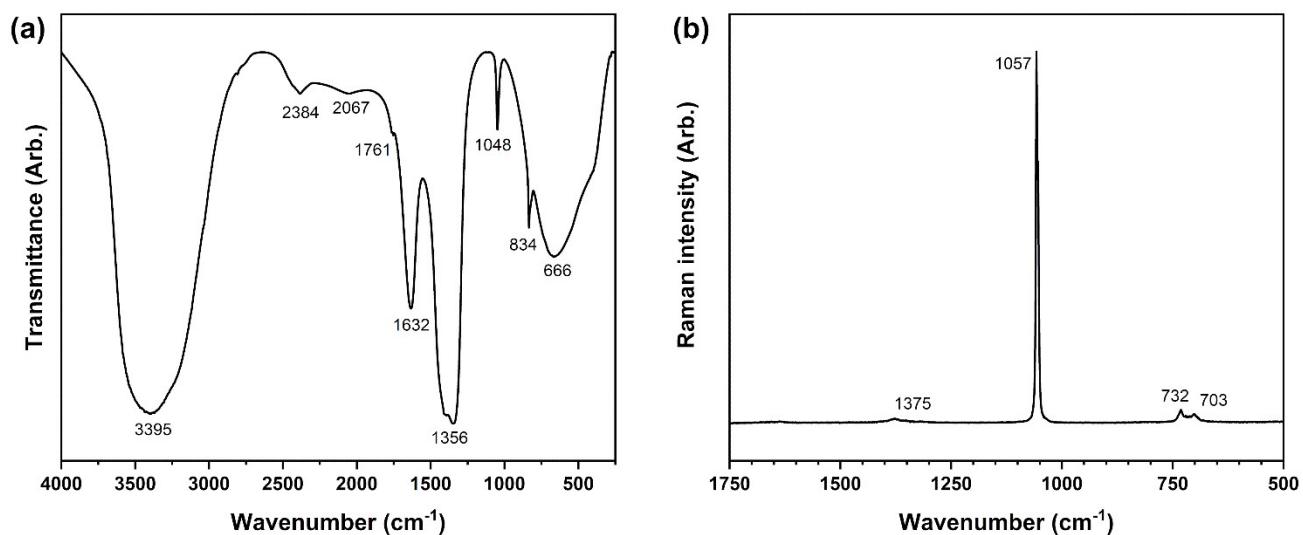

**Figure S4.** (a) Infrared absorption spectra as CsI disks and (b) Raman spectra collected from the nickel(II) nitrate hexahydrate starting reagent.

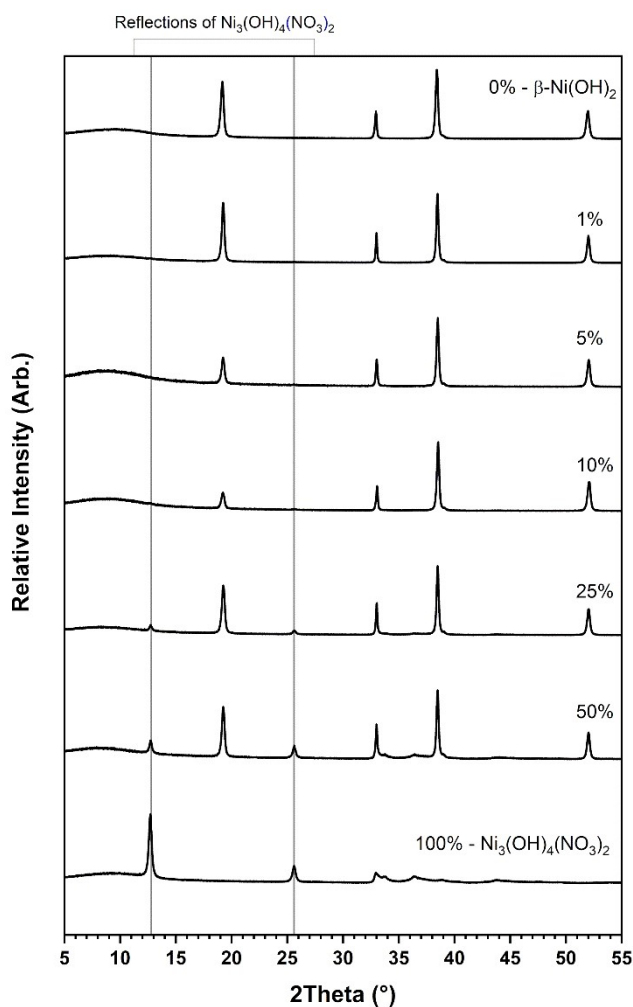

**Figure S5.** Powder X-ray diffraction patterns collected with Cu K $\alpha_1$  radiation ( $\lambda = 1.5405 \text{ \AA}$ ) on standard mixtures formed between  $\beta$ -Ni(OH)<sub>2</sub> and Ni<sub>3</sub>(OH)<sub>4</sub>(NO<sub>3</sub>)<sub>2</sub> at 0, 1, 5, 10, 25, 50 and 100 wt% intervals.

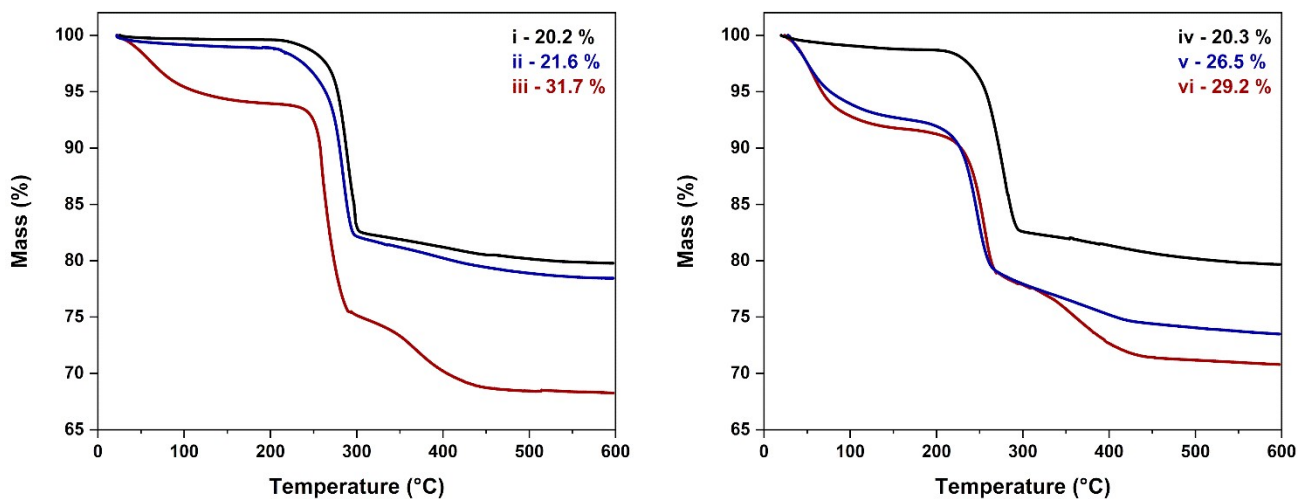

**Figure S6.** Thermogravimetric analysis of the i-vi nickel hydroxide materials showing weight loss profiles by decomposition to nickel(II) oxide.

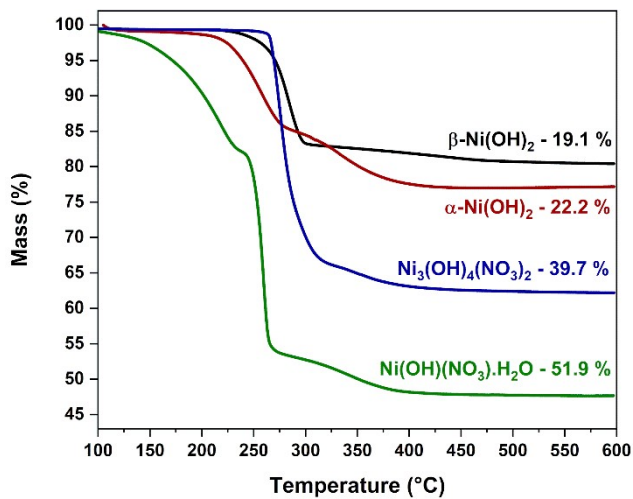

**Figure S7.** Thermogravimetric analysis data for standard  $\beta$ -Ni(OH)<sub>2</sub>,  $\alpha$ -Ni(OH)<sub>2</sub>, Ni<sub>3</sub>(OH)<sub>4</sub>(NO<sub>3</sub>)<sub>2</sub> and Ni(OH)(NO<sub>3</sub>).H<sub>2</sub>O.

## Extended Data Tables

**Table S1.** Preliminary investigations into the preparation of nickel hydroxide materials by the chemical precipitation method using nickel(II) nitrate and potassium hydroxide (1:2 ratio of Ni<sup>2+</sup>:OH<sup>-</sup>) with varying temperatures and chemical ageing durations.

| Synthesis Conditions | Material Assigned                       | PXRD Pattern Reflection Profile | Observed Infrared Bands of Nitrate (cm <sup>-1</sup> ) |                                             |                            |                            |                            |
|----------------------|-----------------------------------------|---------------------------------|--------------------------------------------------------|---------------------------------------------|----------------------------|----------------------------|----------------------------|
|                      |                                         |                                 | $\nu_1$ (C <sub>2v</sub> )                             | $\nu_2$ (D <sub>3h</sub> /C <sub>2v</sub> ) | $\nu_3$ (D <sub>3h</sub> ) | $\nu_3$ (C <sub>2v</sub> ) | $\nu_4$ (D <sub>3h</sub> ) |
| 5 °C, 1 h            | $\beta_{IS}$ -Ni(OH) <sub>2</sub>       | Broad / split 001               | 1046/996                                               | 834                                         | 1364                       | 1501, 1301                 | 652                        |
| 5 °C, 6 h            | $\beta_{IS}$ -Ni(OH) <sub>2</sub>       | Broad / split 001               | 995                                                    | 834                                         | 1366                       | 1497, 1301                 | 648                        |
| 5 °C, 1 d            | $\beta_{IS}$ -Ni(OH) <sub>2</sub>       | Broad / split 001               | 1055                                                   | 834                                         | 1364                       | 1499, 1301                 | 647                        |
| 5 °C, 2 d            | $\beta_{IS}$ -Ni(OH) <sub>2</sub>       | Broad / split 001               | 1050/995                                               | 834                                         | 1364                       | 1497, 1302                 | 650                        |
| 5 °C, 4 d            | $\beta_{IS}$ -Ni(OH) <sub>2</sub>       | Broad / split 001               | 998                                                    | 834                                         | 1364                       | 1498, 1302                 | 649                        |
| 5 °C, 1 w            | $\beta_{IS}$ -Ni(OH) <sub>2</sub>       | Broad / split 001               | 996                                                    | 833                                         | 1368                       | 1502, 1302                 | 656                        |
| 25 °C, 1 h           | $\beta_{IS}$ -Ni(OH) <sub>2</sub>       | Broad / split 001               | 994                                                    | 834                                         | 1367                       | 1502, 1302                 | 655                        |
| 25 °C, 6 h           | $\beta_{IS}$ -Ni(OH) <sub>2</sub>       | Broad / split 001               | 994                                                    | 834                                         | 1364                       | 1498, 1301                 | 649                        |
| 25 °C, 1 d           | $\beta_{IS}$ -Ni(OH) <sub>2</sub>       | Broad                           | 1050                                                   | 832                                         | 1368                       | 1493, 1300                 | 643                        |
| 25 °C, 2 d           | $\beta_{IS}$ -Ni(OH) <sub>2</sub>       | Broad                           | 1050                                                   | 833                                         | 1362                       | 1509, 1298                 | 652                        |
| 25 °C, 4 d           | $\beta/\beta_{IS}$ -Ni(OH) <sub>2</sub> | Crystalline / broad             | 995                                                    | 829                                         | 1368                       | 1501, 1304                 | 643                        |
| 25 °C, 1 w           | $\beta_{SF}$ -Ni(OH) <sub>2</sub>       | Broad                           | -                                                      | 833                                         | 1372                       | -                          | 644                        |
| 50 °C, 1 h           | $\beta_{IS}$ -Ni(OH) <sub>2</sub>       | Broad                           | 1055                                                   | 833                                         | 1364                       | 1496, 1302                 | 652                        |
| 50 °C, 6 h           | $\beta_{IS}$ -Ni(OH) <sub>2</sub>       | Broad                           | 1048                                                   | 833                                         | 1366                       | 1496, 1301                 | 641                        |
| 50 °C, 1 d           | $\beta_{IS}$ -Ni(OH) <sub>2</sub>       | Broad                           | 992                                                    | 833                                         | 1366                       | 1501, 1302                 | 642                        |
| 50 °C, 2 d           | $\beta_{SF}$ -Ni(OH) <sub>2</sub>       | Broad                           | -                                                      | 833                                         | 1374                       | -                          | 648                        |
| 50 °C, 4 d           | $\beta/\beta_{SF}$ -Ni(OH) <sub>2</sub> | Crystalline                     | -                                                      | -                                           | 1363                       | -                          | -                          |
| 50 °C, 1 w           | $\beta/\beta_{SF}$ -Ni(OH) <sub>2</sub> | Crystalline                     | -                                                      | -                                           | 1371                       | -                          | -                          |
| 75 °C, 1 h           | $\beta_{IS}$ -Ni(OH) <sub>2</sub>       | Broad                           | 1049/993                                               | 834                                         | 1364                       | 1496, 1302                 | 649                        |
| 75 °C, 6 h           | $\beta_{SF}$ -Ni(OH) <sub>2</sub>       | Broad                           | -                                                      | 833                                         | 1371                       | -                          | 635                        |
| 75 °C, 1 d           | $\beta_{SF}$ -Ni(OH) <sub>2</sub>       | Broad                           | -                                                      | 833                                         | 1367                       | -                          | 637                        |
| 75 °C, 2 d           | $\beta$ -Ni(OH) <sub>2</sub>            | Highly crystalline              | -                                                      | -                                           | -                          | -                          | -                          |
| 75 °C, 4 d           | $\beta/\beta_{SF}$ -Ni(OH) <sub>2</sub> | Crystalline                     | -                                                      | -                                           | 1366                       | -                          | -                          |
| 75 °C, 1 w           | $\beta/\beta_{SF}$ -Ni(OH) <sub>2</sub> | Crystalline                     | -                                                      | -                                           | 1368                       | -                          | -                          |
| 95 °C, 1 h           | $\beta_{IS}$ -Ni(OH) <sub>2</sub>       | Broad                           | 998                                                    | 833                                         | 1365                       | 1496, 1301                 | 636                        |
| 95 °C, 6 h           | $\beta/\beta_{SF}$ -Ni(OH) <sub>2</sub> | Crystalline                     | -                                                      | -                                           | 1369                       | -                          | -                          |
| 95 °C, 1 d           | $\beta$ -Ni(OH) <sub>2</sub>            | Highly crystalline              | -                                                      | -                                           | -                          | -                          | -                          |
| 95 °C, 2 d           | $\beta$ -Ni(OH) <sub>2</sub>            | Crystalline                     | -                                                      | -                                           | -                          | -                          | -                          |
| 95 °C, 4 d           | $\beta/\beta_{SF}$ -Ni(OH) <sub>2</sub> | Crystalline                     | -                                                      | -                                           | 1374                       | -                          | -                          |
| 95 °C, 1 w           | $\beta$ -Ni(OH) <sub>2</sub>            | Highly crystalline              | -                                                      | -                                           | -                          | -                          | -                          |

**Table S2.** Preliminary investigations into the preparation of nickel hydroxide materials by the chemical precipitation method using nickel(II) nitrate and potassium hydroxide with varying temperatures, chemical ageing durations and stoichiometric ratios of nickel(II) to hydroxide anions.

| Synthesis Conditions | Ni <sup>2+</sup> :OH <sup>-</sup> Ratio | Material Assigned                 | PXRD Pattern Reflection Profile | Observed Infrared Bands of Nitrate (cm <sup>-1</sup> ) |                                             |                            |                            |                            |
|----------------------|-----------------------------------------|-----------------------------------|---------------------------------|--------------------------------------------------------|---------------------------------------------|----------------------------|----------------------------|----------------------------|
|                      |                                         |                                   |                                 | $\nu_1$ (C <sub>2v</sub> )                             | $\nu_2$ (D <sub>3h</sub> /C <sub>2v</sub> ) | $\nu_3$ (D <sub>3h</sub> ) | $\nu_3$ (C <sub>2v</sub> ) | $\nu_4$ (D <sub>3h</sub> ) |
| 5 °C, 1 w            | 1:1                                     | $\beta_{1S}$ -Ni(OH) <sub>2</sub> | Broad / split 001               | 997                                                    | 832                                         | 1364                       | 1503, 1303                 | 659                        |
| 50 °C, 2 d           | 1:1                                     | $\beta_{SF}$ -Ni(OH) <sub>2</sub> | Broad                           | -                                                      | 805                                         | 1364                       | -                          | 527                        |
| 95 °C, 1 w           | 1:1                                     | $\beta$ -Ni(OH) <sub>2</sub>      | Highly crystalline              | -                                                      | -                                           | -                          | -                          | -                          |
| 5 °C, 1 w            | 1:2                                     | $\beta_{1S}$ -Ni(OH) <sub>2</sub> | Broad / split 001               | 996                                                    | 833                                         | 1368                       | 1502, 1302                 | 656                        |
| 50 °C, 2 d           | 1:2                                     | $\beta_{SF}$ -Ni(OH) <sub>2</sub> | Broad                           | -                                                      | 833                                         | 1374                       | -                          | 648                        |
| 95 °C, 1 w           | 1:2                                     | $\beta$ -Ni(OH) <sub>2</sub>      | Highly crystalline              | -                                                      | -                                           | -                          | -                          | -                          |
| 5 °C, 1 w            | 1:3                                     | $\beta_{SF}$ -Ni(OH) <sub>2</sub> | Broad                           | -                                                      | 833                                         | 1377                       | -                          | 648                        |
| 50 °C, 2 d           | 1:3                                     | $\beta_{SF}$ -Ni(OH) <sub>2</sub> | Broad                           | -                                                      | 838                                         | 1368                       | -                          | 635                        |
| 95 °C, 1 w           | 1:3                                     | $\beta_{SF}$ -Ni(OH) <sub>2</sub> | Broad                           | -                                                      | 832                                         | 1369                       | -                          | 521                        |
| 5 °C, 1 w            | 1:4                                     | $\beta_{SF}$ -Ni(OH) <sub>2</sub> | Broad                           | -                                                      | 848                                         | 1379                       | -                          | 649                        |
| 50 °C, 2 d           | 1:4                                     | $\beta_{SF}$ -Ni(OH) <sub>2</sub> | Broad                           | -                                                      | 837                                         | 1364                       | -                          | 524                        |
| 95 °C, 1 w           | 1:4                                     | $\beta_{SF}$ -Ni(OH) <sub>2</sub> | Broad                           | -                                                      | 831                                         | 1363                       | -                          | 515                        |

## References

- 1 L. Markov, K. Petrov and V. Petkov, *Thermochim. Acta*, 1986, **106**, 283–292.
- 2 T. Biswick, W. Jones, A. Pacuła and E. Serwicka, *J. Solid State Chem.*, 2006, **179**, 49–55.
- 3 N. Thomas, *Mater. Res. Bull.*, 2012, **47**, 3568–3572.
- 4 R. W. Cairns and E. Ott, *J. Am. Chem. Soc.*, 1933, **55**, 527–533.
